# Supplementary material for: Iridoid- and flavonoid-enriched fractions ofCornus sanguineaandCornus masexert antioxidant and anti-inflammatory effects and inhibit key enzymes in the treatment of metabolic disorders
Source: Royal Society of Chemistry journal article supplement (doi:10.1039/d3fo02987e), 2023-01-01
Supplement: d3fo02987e1.pdf [file d3fo02987e1.pdf]

## Supplementary Materials

**Table S1.** Inhibition of NO production by *Cornus* fruits extracts and fractions.

|                     | IC <sub>50</sub> (µg/mL) |
|---------------------|--------------------------|
| <i>C. mas</i>       |                          |
| Fresh fruits        |                          |
| MF1                 | 30.12 ± 2.26             |
| MF2                 | 32.31 ± 2.33             |
| MF3                 | 25.45 ± 2.56             |
| MF4                 | 32.14 ± 1.83             |
| Dried fruits        |                          |
| MD1                 | 28.76 ± 2.54             |
| MD2                 | 31.71 ± 1.93             |
| MD3                 | 33.81 ± 1.45             |
| MD4                 | 26.73 ± 1.01             |
| <i>Sign.</i>        | ****                     |
| <i>C. sanguinea</i> |                          |
| Fresh fruits        |                          |
| SF1                 | 31.12 ± 2.22             |
| SF2                 | 28.31 ± 2.87             |
| SF3                 | 30.12 ± 2.32             |
| SF4                 | 27.85 ± 1.36             |
| Dried fruits        |                          |
| SD1                 | 29.93 ± 2.11             |
| SD2                 | 31.04 ± 2.24             |
| SD3                 | 32.25 ± 1.11             |
| SD4                 | 30.26 ± 2.24             |
| <i>Sign.</i>        | ****                     |
| Enriched-fractions  |                          |
| MD2(II)             | 11.79 ± 1.01             |
| MD2(III)            | 13.59 ± 0.76             |
| SD2(II)             | 10.24 ± 1.26             |
| SD2(III)            | 9.19 ± 0.92              |
| <i>Sign.</i>        | ****                     |

MF: *C. mas* fresh fruits; MD: *C. mas* dried fruits; SF: *C. sanguinea* fresh fruits; SD: *C. sanguinea* dried fruits. 1. Ethanolic maceration; 2. Hydroalcoholic (60%) maceration; 3. Ethanol Soxhlet extraction; 4. Ethanol-ultrasound-assisted extraction. (II): 80% Ethanol fraction; (III): 100% Ethanol fraction. Data are expressed as means ± S.D. (n= 3). Differences within and between groups were evaluated by one-way ANOVA followed by a multicomparison Dunnett's test ( $\alpha= 0.05$ ): \*\*\*\* $p < 0.0001$  compared with the negative control (0 µg/mL).

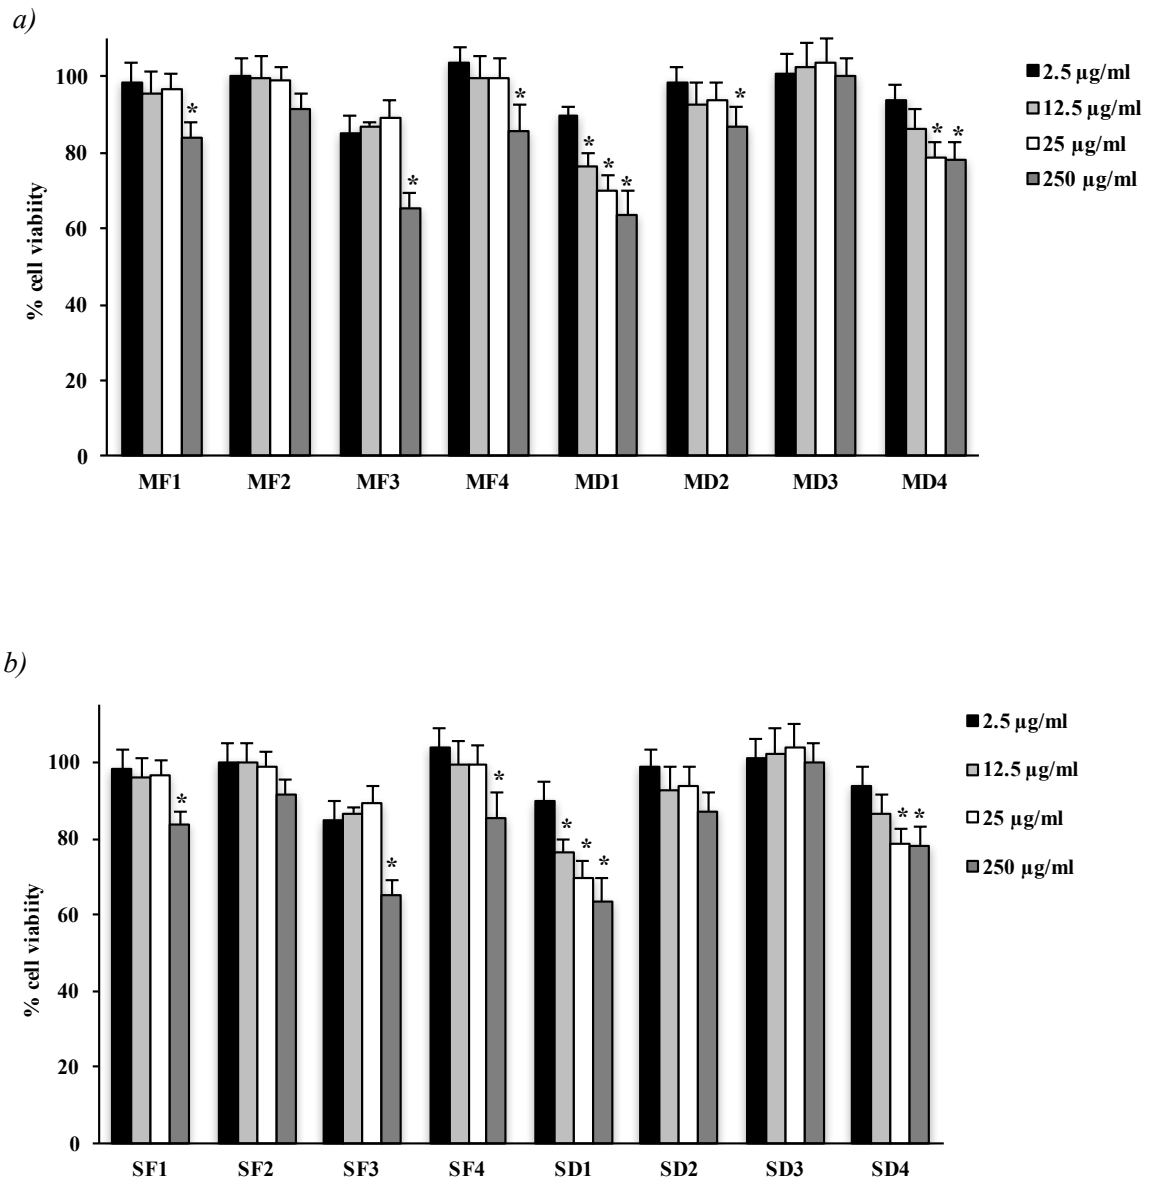

**Figure S1.** Cell viability of HFF1 cells untreated and treated for 24h with a) *C. mas* (MF1-MF4 and MD1-MD4) and b) *C. sanguinea* (SF1-SF4 and SD1-SD4) fruits at different concentrations (2.5-250 µg/mL) evaluated by MTT assay. Values are the mean  $\pm$  S.D. of four experiments in triplicate. Control cells were incubated only with medium and considered as 100% of cell viability. \*Significant vs untreated control cells and vs other concentrations of the same extract  $p < 0.001$ .

a)

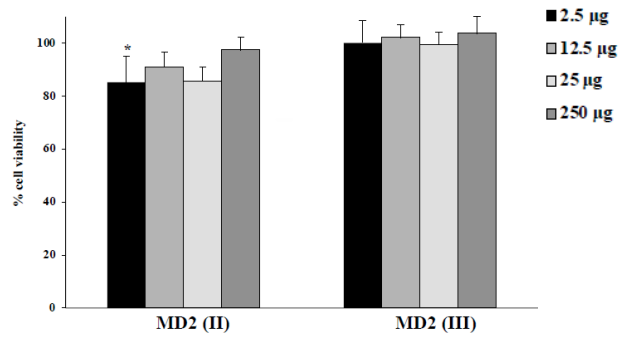

b)

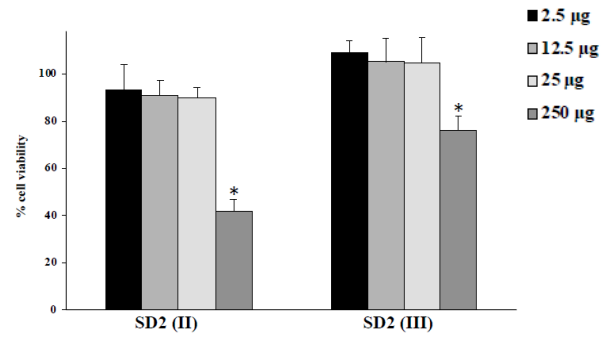

**Figure S2.** Cell viability of HFF1 cells untreated and treated for 24h with a) *C. mas* fractions and b) *C. sanguinea* fractions at different concentrations (2.5-250 µg/mL) evaluated by MTT assay. Values are the mean  $\pm$  S.D. of four experiments in triplicate. Control cells were incubated only with medium and considered as 100% of cell viability. \*Significant vs untreated control cells and vs other concentrations of the same extract  $p < 0.001$ .
